# Supplementary material for: Fungal foraging behaviour and hyphal space exploration in micro-structured Soil Chips
Source: PubMed Central journal article supplement (PMC8163874; doi:10.1038/s41396-020-00886-7), 2021-01-19
Supplement: 41396_2020_886_MOESM1_ESM.pdf [file 41396_2020_886_MOESM1_ESM.pdf]

## SUPPORTING INFORMATION

### **Methods for fabrication of the Obstacle chip:**

The design of the chip was drawn in AutoCAD 2015 software (Autodesk), and printed as a glass photolithography mask (JD photo data, UK: <http://www.jd-photodata.co.uk/>). The chip was fabricated using polydimethylsiloxane (PDMS) moulding on a photoresist master generated by UV lithography [33]. A thick negative photoresist, SU-8 5 (MicroChem Corp, USA), was spin-coated onto a glass plate using at 1250 rpm for 60 seconds, resulting in a layer thickness of approximately 7  $\mu\text{m}$ . After a soft bake step (90 °C for 5 minutes on a hot plate) the resist was exposed with a MA4 Karl-Suss mask aligner to define the pattern in the photoresist, followed by a post-exposure bake step. The pattern was developed in mr-Dev 600 (MicroChem) for 3 minutes and then rinsed using isopropanol (VWR International). PDMS (Sylgard 184, Dow Corning, USA) was prepared with a base-to-curing agent ratio of 10:1 following the protocol from the manufacturer, thoroughly stirred and poured on top of the master. Subsequently, the PDMS-covered master was then degassed in a vacuum chamber at -25kPa for approximately one hour. Finally, the PDMS was cured in an oven at 60°C for two hours after which the cured structure could be peeled off from the master.

The pieces with the desired pattern imprint were carefully cut out from the PDMS and bonded to glass slides by exposing surfaces of both to UV light in an oxygen plasma chamber (UV Ozone Cleaner – ProCleaner™, Bioforce Nanosciences) for 10 minutes and subsequently pressing the two surfaces together. To achieve optimal bonding, glass slides were cleaned with acetone, 75% ethanol, and deionized water and air-blown dry before use. Bonded chips were then placed in sterile petri dishes of 140 mm diameter.

**Supporting Table S1.** Culturing conditions and background ecology of the fungal strains and species used in the experiment.

| <b>Strain</b> | <b>Order</b> | <b>Species</b>                   | <b>Temp. (°C)</b> | <b>Inoculation age (days)</b> | <b>Ecology</b>                                                                                                                                            |
|---------------|--------------|----------------------------------|-------------------|-------------------------------|-----------------------------------------------------------------------------------------------------------------------------------------------------------|
| <b>175,51</b> | Agaricales   | <i>Coprinellus angulatus</i>     | 20                | 7                             | Grows after fire events, attached to small fragments of charcoal, early coloniser (Lange & Smith, Alexander 1953; Hernández-Rodríguez <i>et al.</i> 2013) |
| <b>406,79</b> | Agaricales   | <i>Gymnopus confluens</i>        | 20                | 36                            | Grows on hardwood duff and leaf litter (Hughes & Petersen 2015)                                                                                           |
| <b>146,42</b> | Agaricales   | <i>Leucoagaricus leucothites</i> | 26                | 15                            | Grows in grassy areas or on disturbed grounds (Vellinga & Davis 2006).                                                                                    |
| <b>437,85</b> | Agaricales   | <i>Leucopaxillus gentianeus</i>  | 20                | 36                            | Grows on conifer litter, rarely on deciduous litter (Garnier-Delcourt <i>et al.</i> 2011)                                                                 |
| <b>850,87</b> | Agaricales   | <i>Mycetinis scorodonius</i>     | 26                | 15                            | Grows on coniferous needles or dead deciduous leaves in forests and heaths (Petersen & Hughes 2017)                                                       |
| <b>101986</b> | Agaricales   | <i>Psilocybe cf. subviscida</i>  | 20                | 15                            | Grows on raw humus of grasses, straw and partly digested dung (Boekhout <i>et al.</i> 2002)                                                               |
| <b>660,87</b> | Agaricales   | <i>Tricholomella constricta</i>  | 20                | 36                            | Grows in pastures on hardwood litter, is slightly nitrophilous (Kalamees 1992; Hofstetter <i>et al.</i> 2014)                                             |

**Supporting Table S2.** Response variables measured for the seven examined Basidiomycetes that were included into the principal component analysis (Fig. 6). “Mean speed” was measured as the first derivative of the growth curve. “Growth duration” was measured as the time hyphal growth inside the chip was observed. “Far in straight channels” denotes the mean maximum distance the hyphae reached in straight channels of 10 $\mu$ m width. “Far in z-shaped channels” denotes the mean maximum distance the hyphae reached in z-shaped channels, 10 $\mu$ m width, meandering taken into account. “Branching in open diamonds” is the percentage of openings without a perpendicular obstacle in which at least one hypha branched. “Dense in diamonds” is the percentage of the hyphal coverage of openings without a perpendicular obstacle. “Hyphal flexibility” was measured as the angle an hypha formed when hitting the obstacle in perpendicularly blocked openings, where 90 denotes greatest bendability and 45 highest rigidity. “Far in small obstacle course” denotes the mean maximum distance the hyphae reached in an obstacle course with complex and irregular shapes, relative measure. “#Hyphae entry:front” denotes the ratio of the number of hyphae at the beginning of the 20  $\mu$ m wide channels (200  $\mu$ m for the entry) to the number of hyphae at the mycelial front (100  $\mu$ m from the outermost tip).

| Species                 | Mean speed [ $\mu$ m*d-1] | Growth duration [d] | Far in straight channels [ $\mu$ m] | #Hyphae in 20 $\mu$ m channels | Far in z-shaped channels [ $\mu$ m] | Branching in open diamonds [%] | Dense in diamonds [%] | Prefers wide channels | Hyphal flexibility | Far in small obstacle course | #Hyphae entry:front |
|-------------------------|---------------------------|---------------------|-------------------------------------|--------------------------------|-------------------------------------|--------------------------------|-----------------------|-----------------------|--------------------|------------------------------|---------------------|
| <i>C. angulatus</i>     | 928                       | 11                  | 15000                               | 15                             | 2500                                | 12                             | 20                    | 1.0                   | 58                 | 5.1                          | 2.4                 |
| <i>M. scorodoni</i>     | 722                       | 26                  | 9000                                | 10                             | 8000                                | 60                             | 80                    | 1.0                   | 68                 | 10.7                         | 9.8                 |
| <i>G. confluens</i>     | 62                        | 90                  | 5500                                | 2.5                            | 24500                               | 85                             | 16                    | 2.9                   | 85                 | 4.2                          | 2.1                 |
| <i>P. cf. subvicida</i> | 352                       | 60                  | 18500                               | 1                              | 4000                                | 53                             | 75                    | 5.7                   | 57                 | 1.9                          | 1                   |
| <i>L. gentianeus</i>    | 342                       | 35                  | 6500                                | 20                             | 500                                 | 85                             | 40                    | 1.2                   | 63                 | 5.1                          | 6.1                 |
| <i>T. constricta</i>    | 227                       | 27                  | 4500                                | 2                              | 0                                   | 74                             | 30                    | 1.3                   | 71                 | 3                            | 2                   |
| <i>L. leucothites</i>   | 173                       | 70                  | 8000                                | 3.5                            | 6200                                | 93                             | 10                    | 1.0                   | 88                 | 3.7                          | 3.5                 |

**Supporting Table S3.** One-way ANOVA of the raw data for how far hyphae of the different species grew into channels of different shapes and angles.

| <b>Species</b>           | <b>Channel shape</b> | <b>F ratio</b> | <b>p-value</b> | <b>Tukey-Kramer's HSD</b> |
|--------------------------|----------------------|----------------|----------------|---------------------------|
| <i>C. angulatus</i>      | all                  | 80.79          | <0.0001        |                           |
|                          | Zigzag               |                |                | A                         |
|                          | Square               |                |                | B                         |
| <i>G. confluens</i>      | z-shape              | 4.9205         | 0.0147         | C                         |
|                          | all                  |                |                | A                         |
|                          | Zigzag               |                |                | AB                        |
| <i>L. leucothites</i>    | Square               | 0.0366         | 0.96           | B                         |
|                          | z-shape              |                |                | A                         |
|                          | all                  |                |                | A                         |
| <i>L. gentianeus</i>     | Zigzag               | 4.19           | 0.0241         | A                         |
|                          | Square               |                |                | AB                        |
|                          | z-shape              |                |                | B                         |
| <i>M. scorodonius</i>    | all                  | 41.26          | <0.0001        |                           |
|                          | Zigzag               |                |                | A                         |
|                          | Square               |                |                | A                         |
| <i>P. cf. subviscida</i> | z-shape              | 13.00          | <0.0001        | B                         |
|                          | all                  |                |                |                           |
|                          | Zigzag               |                |                | A                         |
|                          | Square               |                |                | A                         |
|                          | z-shape              |                |                | B                         |

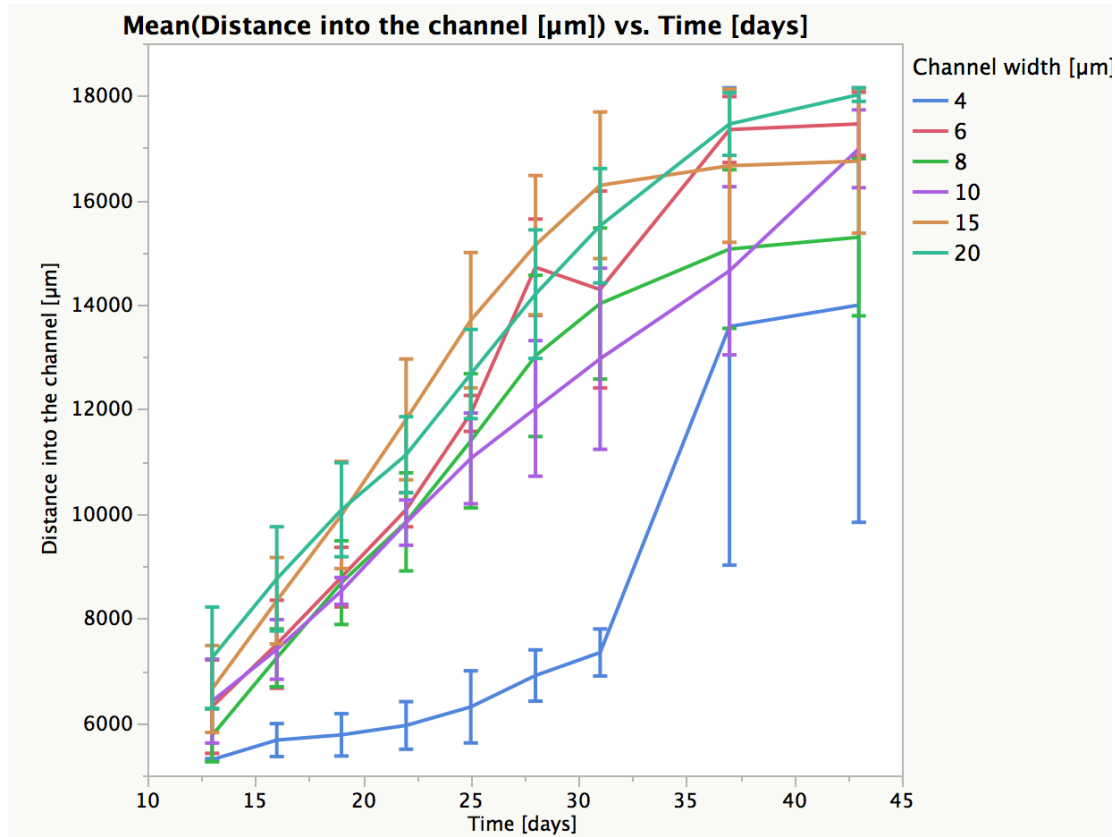

**Supporting Figure S1.** Comparison of hyphal growth of *P.cf. subvicida* over time in straight channels of different widths (4-20μm).

## References SI

- Boekhout, T., Stalpers, J., Verduin, S.J.W., Rademaker, J. & Noordeloos, M.E. (2002). Experimental taxonomic studies in *Psilocybe* sect. *Psilocybe*. *Mycol. Res.*, 106, 1251–1261.
- Garnier-Delcourt, M., Reckinger, C., Tholl, M.-T. & Turk, J. (2011). Notes mycologiques luxembourgeoises. IV. *Bull. Soc. Nat. luxemb*, 112, 39–50.
- Hernández-Rodríguez, M., Oria-de-Rueda, J.A. & Martín-Pinto, P. (2013). Post-fire fungal succession in a Mediterranean ecosystem dominated by *Cistus ladanifer* L. *For. Ecol. Manage.*, 289, 48–57.
- Hofstetter, V., Redhead, S.A., Kauff, F., Moncalvo, J.-M., Matheny, P.B. & Vilgalys, R. (2014). Taxonomic Revision and Examination of Ecological Transitions of the Lyophyllaceae (Basidiomycota, Agaricales) Based on a Multigene Phylogeny. *Cryptogam. Mycol.*, 35, 399–425.
- Hughes, K.W. & Petersen, R.H. (2015). Transatlantic disjunction in fleshy fungi III: *Gymnopus confluens*. *MycKeys*, 9, 37–63.
- Kalamees, K. (1992). *Tricholomella*, a new genus, with the distribution data of *Tricholomella constrictum*, comb. nov. in East Europe and Asia. *Persoonia*, 14, 445–447.
- Lange, M. & Smith, Alexander, H. (1953). The coprinus ephemerus group. *Mycologia*, 45, 747–780.
- Pantidou, M., Watling R. & Gonou Z. (1983). Mycelial characters, anamorphs, and teleomorphs in genera and species of various families of Agaricales in culture. *Mycotaxon* 17, 409–432.
- Petersen, R.H. & Hughes, K.W. (2017). An investigation on *Mycetinis* (Euagarics, Basidiomycota). *MycKeys*, 24, 1–138.
- Valenzuela, E. & Garnica, S. (2000). *Pseudohelicomyces*, a new anamorph of *Psilocybe*, 104, 738–741.
- Vellinga, E.C. & Davis, R.M. (2006). Lepiotaceous fungi in California, U.S.A. – 1., 98, 197–204.
